# Supplementary material for: The Antibiotic Use Questionnaire - Parent Version: A measure of the drivers of parental decisions about the use of antibiotics with their children
Source: Research Square preprint supplement (doi:10.21203/rs.3.rs-7153648/v1), 2025-07-28
Supplement: Supplementary file 1 [file 5da1918500cba4364f059192.docx]

**Online Resource 1**

**(Antibiotic Use Questionnaire – Parent Version)**

**Article title:** The Antibiotic Use Questionnaire - Parent Version: A measure of the drivers of parental decisions about the use of antibiotics with their children

**Journal:** European Journal of Pediatrics

**Authors:** Stephanie A. Marsh, Nina Reynolds, Mitchell K. Byrne, Sebastien Miellet

**Affiliation:** University of Wollongong, NSW Australia

**Corresponding author:** [smiellet@uow.edu.au](mailto:smiellet@uow.edu.au)

**Antibiotic Use Questionnaire – Parent Version (AUQ-PV)**

1. **What is your age?**

- _________________

1. **What is your gender?**

- Male
- Female
- Non-binary: I identify as_____________
- Other/prefer not to say

1. **How many children in your care are 12 years and below?**

- _________________

1. **What is your relation to the child or children?**

- Mother
- Father
- Grandparent
- Other

1. **What is the highest level of education you have completed?**

- Primary School
- Secondary School, did not complete year 12
- Secondary School, completed year 12
- TAFE
- Bachelor’s Degree
- Postgraduate Degree, i.e. Masters, PhD

1. **What is your postcode?**

- ________

1. **Are you trained in health-related fields? (e.g., doctor, nurse, physiotherapist, psychologist, occupational therapist)**

- Yes
- No

1. **Is there a healthcare worker in your family or friend group? (e.g., doctor, nurse, physiotherapist, psychologist, occupational therapist)**

- Yes
- No

1. **Antibiotics will reduce my child’s cold symptoms**

| Strongly Disagree | Disagree | Agree | Strongly Agree |
| --- | --- | --- | --- |

1. **My friends and family follow recommendations for antibiotic use**

| Strongly Disagree | Disagree | Agree | Strongly Agree |
| --- | --- | --- | --- |

1. **Antibiotics are needed for the common cold**

| Strongly Disagree | Disagree | Agree | Strongly Agree |
| --- | --- | --- | --- |

1. **I am always courteous, even to people who are disagreeable**

True False

1. **Antibiotics may have negative side effects**

| Strongly Disagree | Disagree |  | Agree | Strongly Agree |
| --- | --- | --- | --- | --- |

1. **There have been times when I felt like rebelling against people in authority even though I knew they were right**

True False

1. **I would give my child antibiotics without consulting a doctor**

| Strongly Disagree | Disagree | Agree | Strongly Agree |
| --- | --- | --- | --- |

1. **I use leftover or unused antibiotics or scripts to treat my child**

| Strongly Disagree | Disagree | Agree | Strongly Agree |
| --- | --- | --- | --- |

1. **No matter who I’m talking to, I’m always a good listener**

True False

1. **It is my right to ask the doctor to prescribe antibiotics for my child**

| Strongly Disagree | Disagree | Agree | Strongly Agree |
| --- | --- | --- | --- |

1. **My friends and family only give antibiotics to their children when prescribed**

| Strongly Disagree | Disagree | Agree | Strongly Agree |
| --- | --- | --- | --- |

1. **I’m always willing to admit it when I make a mistake**

True False

1. **I know my child needs antibiotics before I see my doctor**

| Strongly Disagree | Disagree | Agree | Strongly Agree |
| --- | --- | --- | --- |

1. **In my community, it is common to use antibiotics without a prescription**

| Strongly Disagree | Disagree | Agree | Strongly Agree |
| --- | --- | --- | --- |

1. **I feel confident to ask for antibiotics for my child when they need them**

| Strongly Disagree | Disagree | Agree | Strongly Agree |
| --- | --- | --- | --- |

1. **I have never deliberately said something that hurt someone’s feelings**

True False

1. **Antibiotics are less likely to work in the future**

| Strongly Disagree | Disagree | Agree | Strongly Agree |
| --- | --- | --- | --- |

1. **I consult with my doctor prior to giving my child antibiotics**

| Strongly Disagree | Disagree | Agree | Strongly Agree |
| --- | --- | --- | --- |

1. **There have been times when I was quite jealous of the good fortune of others**

True False

1. **I keep leftover or unused antibiotics or scripts for my child**

| Strongly Disagree | Disagree | Agree | Strongly Agree |
| --- | --- | --- | --- |

1. **I could easily get antibiotics for my child from a doctor**

| Extremely Difficult | Difficult | Easy | Extremely Easy |
| --- | --- | --- | --- |
|  |  |  |  |

1. **I could easily get antibiotics for my child online**

| Extremely Difficult | Difficult | Easy | Extremely Easy |
| --- | --- | --- | --- |

1. **I could easily get antibiotics for my child from my family / a friend / household**

| Extremely Difficult | Difficult | Easy | Extremely Easy |
| --- | --- | --- | --- |

1. **By the time my child is sick enough to see my doctor, I expect a prescription of antibiotics**

| Strongly Disagree | Disagree | Agree | Strongly Agree |
| --- | --- | --- | --- |

1. **When it is difficult to access health services I rely on the advice and resources of my social network when making decisions about giving my child antibiotics**

| Strongly Disagree | Disagree | Agree | Strongly Agree |
| --- | --- | --- | --- |

1. **I give my child leftover antibiotics or antibiotics given to me by a friend or family member to save time and money**

| Strongly Disagree | Disagree | Agree | Strongly Agree |
| --- | --- | --- | --- |
