# Supplementary material for: The Antibiotic Use Questionnaire - Parent Version: A measure of the drivers of parental decisions about the use of antibiotics with their children
Source: Research Square preprint supplement (doi:10.21203/rs.3.rs-7153648/v1), 2025-07-28
Supplement: Supplementary file 2 [file a72f6709bf1dfc2eb26a8ae0.docx]

**Online Resource 4**

**(General Linear Model Results – Metropolitan Cohort)**

**Article title:** The Antibiotic Use Questionnaire - Parent Version: A measure of the drivers of parental decisions about the use of antibiotics with their children

**Journal:** European Journal of Pediatrics

**Authors:** Stephanie A. Marsh, Nina Reynolds, Mitchell K. Byrne, Sebastien Miellet

**Affiliation:** University of Wollongong, NSW Australia

**Corresponding author:** [smiellet@uow.edu.au](mailto:smiellet@uow.edu.au)

**General linear model results**

**Model results – Metropolitan cohort**

**Omnibus tests**

|  | **SS** | **df** | **F** | ***p*** | **η2p** |
| --- | --- | --- | --- | --- | --- |
| **Model** | 850.9104 | 19 | 11.82932 | < .001 | 0.491 |
| Perceived Behavioural Control Total Score | 74.8381 | 1 | 19.76754 | < .001 | 0.078 |
| Attitude Total Score | 27.7712 | 1 | 7.33541 | 0.007 | 0.031 |
| Social Norms Total Score | 255.4015 | 1 | 67.46105 | < .001 | 0.225 |
| Knowledge Total Score | 19.3002 | 1 | 5.09790 | 0.025 | 0.021 |
| Education | 23.0131 | 5 | 1.21572 | 0.302 | 0.025 |
| Healthcare Worker Training | 0.2680 | 1 | 0.07079 | 0.790 | 0.000 |
| Healthcare Worker in Family | 1.1507 | 1 | 0.30394 | 0.582 | 0.001 |
| Relation to the child | 3.6067 | 3 | 0.31756 | 0.813 | 0.004 |
| Number of children <12yrs | 0.0252 | 1 | 0.00666 | 0.935 | 0.000 |
| Age | 12.4010 | 1 | 3.27556 | 0.072 | 0.014 |
| Gender | 4.5777 | 2 | 0.60457 | 0.547 | 0.005 |
| Social Desirability Score | 16.8720 | 1 | 4.45653 | 0.036 | 0.019 |
| Residuals | 882.1173 | 233 |  |  |  |
| Total | 1733.0277 | 252 |  |  |  |

**Parameter estimates – Metropolitan cohort**

| **95% Confidence Internal** | | | | | | | | | |
| --- | --- | --- | --- | --- | --- | --- | --- | --- | --- |
| **Names** | **Effect** | **Estimate** | **SE** | **Lower** | **Upper** | **β** | **df** | **t** | ***p*** |
| (Intercept) | (Intercept) | 6.2284 | 1.8500 | 2.5836 | 9.87320 | 0.00000 | 233 | 3.3667 | < .001 |
| PBC[a](#a) Total Score | PBC Total Score | -0.3467 | 0.0780 | -0.5004 | -0.19309 | -0.25633 | 233 | -4.4461 | < .001 |
| ATT[a](#a) Total Score | ATT Total Score | 0.1865 | 0.0689 | 0.0508 | 0.32217 | 0.15709 | 233 | 2.7084 | 0.007 |
| SN[a](#a) Total Score | SN Total Score | 0.7149 | 0.0870 | 0.5434 | 0.88637 | 0.42837 | 233 | 8.2135 | < .001 |
| Knowledge Total Score | Knowledge Total Score | 0.1580 | 0.0700 | 0.0201 | 0.29592 | 0.12805 | 233 | 2.2579 | 0.025 |
| Education1 | Secondary School, did not complete year 12 - Primary School | 1.4526 | 0.9201 | -0.3602 | 3.26542 | 0.55392 | 233 | 1.5787 | 0.116 |
| Education2 | Secondary School, completed year 12 - Primary School | 0.2022 | 0.8959 | -1.5628 | 1.96730 | 0.07712 | 233 | 0.2258 | 0.822 |
| Education3 | TAFE - Primary School | 0.7951 | 0.8536 | -0.8866 | 2.47680 | 0.30319 | 233 | 0.9315 | 0.353 |
| Education4 | Bachelor’s Degree - Primary School | 0.7755 | 0.8338 | -0.8673 | 2.41829 | 0.29572 | 233 | 0.9301 | 0.353 |
| Education5 | Postgraduate Degree, i.e. Masters, PhD - Primary School | 0.4994 | 0.8767 | -1.2279 | 2.22668 | 0.19042 | 233 | 0.5696 | 0.570 |
| Healthcare Worker Training1 | No - Yes | 0.1176 | 0.4420 | -0.7532 | 0.98840 | 0.04484 | 233 | 0.2661 | 0.790 |
| Healthcare Worker in Family1 | No - Yes | 0.1741 | 0.3158 | -0.4481 | 0.79630 | 0.06639 | 233 | 0.5513 | 0.582 |
| Relation to the child1 | Grandparent - Mother | 0.4459 | 1.2206 | -1.9589 | 2.85076 | 0.17004 | 233 | 0.3653 | 0.715 |
| Relation to the child2 | Father - Mother | -0.3860 | 0.8550 | -2.0705 | 1.29843 | -0.14720 | 233 | -0.4515 | 0.652 |
| Relation to the child3 | Other - Mother | -0.1472 | 0.7384 | -1.6020 | 1.30769 | -0.05612 | 233 | -0.1993 | 0.842 |
| Number of children below 12yrs | Number of children below 12yrs | 0.0130 | 0.1596 | -0.3014 | 0.32748 | 0.00402 | 233 | 0.0816 | 0.935 |
| Age | Age | -0.0277 | 0.0153 | -0.0579 | 0.00246 | -0.10505 | 233 | -1.8098 | 0.072 |
| Gender1 | Male - Female | 0.3092 | 0.8375 | -1.3408 | 1.95920 | 0.11791 | 233 | 0.3692 | 0.712 |
| Gender2 | Other/prefer not to say - Female | 2.1131 | 2.0314 | -1.8892 | 6.11540 | 0.80577 | 233 | 1.0402 | 0.299 |
| Social Desirability Score | Social Desirability Score | 0.1907 | 0.0903 | 0.0127 | 0.36873 | 0.10628 | 233 | 2.1111 | 0.036 |

**a**PBC: Perceived behavioural control; ATT: Attitude; SN: Social norms
