# Supplementary material for: The Antibiotic Use Questionnaire - Parent Version: A measure of the drivers of parental decisions about the use of antibiotics with their children
Source: Research Square preprint supplement (doi:10.21203/rs.3.rs-7153648/v1), 2025-07-28
Supplement: Supplementary file 3 [file ad97e6a6a087ffbdf0b5486c.docx]

**Online Resource 3**

**(General Linear Model Results – Rural Cohort)**

**Article title:** The Antibiotic Use Questionnaire - Parent Version: A measure of the drivers of parental decisions about the use of antibiotics with their children

**Journal:** European Journal of Pediatrics

**Authors:** Stephanie A. Marsh, Nina Reynolds, Mitchell K. Byrne, Sebastien Miellet

**Affiliation:** University of Wollongong, NSW Australia

**Corresponding author:** [smiellet@uow.edu.au](mailto:smiellet@uow.edu.au)

**General linear model results**

**Model results – Rural cohort**

**Omnibus tests**

|  | **SS** | **df** | **F** | ***p*** | **η2p** |
| --- | --- | --- | --- | --- | --- |
| **Model** | 538.8784 | 20 | 7.95333 | < .001 | 0.404 |
| Perceived Behavioural Control Total Score | 25.2857 | 1 | 7.46386 | 0.007 | 0.031 |
| Attitude Total Score | 10.7668 | 1 | 3.17815 | 0.076 | 0.013 |
| Social Norms Total Score | 172.5672 | 1 | 50.93856 | < .001 | 0.178 |
| Knowledge Total Score | 50.7381 | 1 | 14.97692 | < .001 | 0.060 |
| Education | 18.2600 | 5 | 1.07800 | 0.373 | 0.022 |
| Healthcare Worker Training | 2.6844 | 1 | 0.79240 | 0.374 | 0.003 |
| Healthcare Worker in Family | 0.0194 | 1 | 0.00572 | 0.940 | 0.000 |
| Relation to the child[a](#footnote) | 36.9389 | 3 | 3.63455 | 0.014 | 0.044 |
| Number of children <12yrs | 0.3468 | 1 | 0.10238 | 0.749 | 0.000 |
| Age | 1.1086 | 1 | 0.32724 | 0.568 | 0.001 |
| Gender | 9.1987 | 3 | 0.90510 | 0.439 | 0.011 |
| Social Desirability Score | 5.9126 | 1 | 1.74528 | 0.188 | 0.007 |
| Residuals | 796.1216 | 235 |  |  |  |
| Total | 1335.0000 | 255 |  |  |  |

**a**While ‘relation to the child’ was associated with antibiotic use intentions (*P*=0.014), further analysis indicated that the variance was not comparable because there were fewer data points for the ‘other’ category.

**Parameter estimates – Rural cohort**

| **95% Confidence Internal** | | | | | | | | | |
| --- | --- | --- | --- | --- | --- | --- | --- | --- | --- |
| **Names** | **Effect** | **Estimate** | **SE** | **Lower** | **Upper** | **β** | **df** | **t** | ***p*** |
| (Intercept) | (Intercept) | 4.51854 | 1.6595 | 1.2492 | 7.7878 | 0.00000 | 235 | 2.7229 | 0.007 |
| PBC[a](#a) Total Score | PBC Total Score | -0.21230 | 0.0777 | -0.3654 | -0.0592 | -0.15714 | 235 | -2.7320 | 0.007 |
| ATT[a](#a) Total Score | ATT Total Score | 0.11491 | 0.0645 | -0.0121 | 0.2419 | 0.10284 | 235 | 1.7827 | 0.076 |
| SN[a](#a) Total Score | SN Total Score | 0.58824 | 0.0824 | 0.4259 | 0.7506 | 0.39614 | 235 | 7.1371 | < .001 |
| Knowledge Total Score | Knowledge Total Score | 0.23172 | 0.0599 | 0.1138 | 0.3497 | 0.21859 | 235 | 3.8700 | < .001 |
| Education1 | Secondary School, did not complete year 12 - Primary School | -0.01409 | 1.1354 | -2.2510 | 2.2229 | -0.00616 | 235 | -0.0124 | 0.990 |
| Education2 | Secondary School, completed year 12 - Primary School | 0.21427 | 1.1237 | -1.9996 | 2.4281 | 0.09365 | 235 | 0.1907 | 0.849 |
| Education3 | TAFE - Primary School | 0.33802 | 1.1067 | -1.8422 | 2.5183 | 0.14773 | 235 | 0.3054 | 0.760 |
| Education4 | Bachelor’s Degree - Primary School | 0.82324 | 1.1064 | -1.3565 | 3.0030 | 0.35980 | 235 | 0.7441 | 0.458 |
| Education5 | Postgraduate Degree, i.e. Masters, PhD - Primary School | 0.39374 | 1.1837 | -1.9383 | 2.7257 | 0.17208 | 235 | 0.3326 | 0.740 |
| Healthcare Worker Training1 | No - Yes | 0.32143 | 0.3611 | -0.3900 | 1.0328 | 0.14048 | 235 | 0.8902 | 0.374 |
| Healthcare Worker in Family1 | No - Yes | -0.02046 | 0.2706 | -0.5535 | 0.5126 | -0.00894 | 235 | -0.0756 | 0.940 |
| Relation to the child1 | Grandparent - Mother | 0.64072 | 0.8276 | -0.9898 | 2.2712 | 0.28002 | 235 | 0.7742 | 0.440 |
| Relation to the child2 | Father - Mother | -0.99888 | 0.8727 | -2.7182 | 0.7204 | -0.43656 | 235 | -1.1446 | 0.254 |
| Relation to the child3 | Other - Mother | -2.03332 | 0.6802 | -3.3734 | -0.6933 | -0.88866 | 235 | -2.9893 | 0.003 |
| Number of children below 12yrs | Number of children below 12yrs | -0.04212 | 0.1316 | -0.3015 | 0.2172 | -0.01704 | 235 | -0.3200 | 0.749 |
| Age | Age | -0.00887 | 0.0155 | -0.0394 | 0.0217 | -0.03809 | 235 | -0.5721 | 0.568 |
| Gender1 | Male - Female | 1.12019 | 0.8587 | -0.5716 | 2.8119 | 0.48958 | 235 | 1.3045 | 0.193 |
| Gender2 | Other/prefer not to say - Female | -1.77402 | 1.8820 | -5.4818 | 1.9338 | -0.77533 | 235 | -0.9426 | 0.347 |
| Gender3 | Non-binary: I identify as - Female | -0.31584 | 1.1300 | -2.5421 | 1.9105 | -0.13804 | 235 | -0.2795 | 0.780 |
| Social Desirability Score | Social Desirability Score | 0.11766 | 0.0891 | -0.0578 | 0.2931 | 0.07055 | 235 | 1.3211 | 0.188 |

**a**PBC: Perceived behavioural control; ATT: Attitude; SN: Social norms
