# Supplementary material for: The Antibiotic Use Questionnaire - Parent Version: A measure of the drivers of parental decisions about the use of antibiotics with their children
Source: Research Square preprint supplement (doi:10.21203/rs.3.rs-7153648/v1), 2025-07-28
Supplement: Supplementary file 4 [file e896143e6572dbfd9d8c9f94.docx]

**Online Resource 2**

**(General Linear Model Results – Combined Cohort)**

**Article title:** The Antibiotic Use Questionnaire - Parent Version: A measure of the drivers of parental decisions about the use of antibiotics with their children

**Journal:** European Journal of Pediatrics

**Authors:** Stephanie A. Marsh, Nina Reynolds, Mitchell K. Byrne, Sebastien Miellet

**Affiliation:** University of Wollongong, NSW Australia

**Corresponding author:** [smiellet@uow.edu.au](mailto:smiellet@uow.edu.au)

**General linear model results**

**Model results – Combined cohort**

**Omnibus tests**

|  | **SS** | **df** | **F** | ***p*** | **η2p** |
| --- | --- | --- | --- | --- | --- |
| **Model** | 1332.43800 | 21 | 17.601 | <.001 | 0.431 |
| Perceived Behavioural Control Total Score | 100.87101 | 1 | 27.982 | <.001 | 0.054 |
| Attitude Total Score | 38.25182 | 1 | 10.611 | 0.001 | 0.021 |
| Social Norms Total Score | 435.51967 | 1 | 120.813 | <.001 | 0.199 |
| Knowledge Total Score | 81.22158 | 1 | 22.531 | <.001 | 0.044 |
| Education | 17.69785 | 5 | 0.982 | 0.428 | 0.010 |
| Healthcare Worker Training | 0.65439 | 1 | 0.182 | 0.670 | 0.000 |
| Healthcare Worker in Family | 0.62300 | 1 | 0.173 | 0.678 | 0.000 |
| Relation to the child | 25.18811 | 3 | 2.329 | 0.074 | 0.014 |
| Number of children <12yrs | 0.00190 | 1 | 5.26e-4 | 0.982 | 0.000 |
| Age | 9.11062 | 1 | 2.527 | 0.113 | 0.005 |
| Gender | 6.80663 | 3 | 0.629 | 0.596 | 0.004 |
| Social Desirability Score | 24.77430 | 1 | 6.872 | 0.009 | 0.014 |
| Area | 4.15279 | 1 | 1.152 | 0.284 | 0.002 |
| Residuals | 1755.59344 | 487 |  |  |  |
| Total | 3088.03143 | 508 |  |  |  |

**Parameter estimates – Combined cohort**

| **95% Confidence Internal** | | | | | | | | | |
| --- | --- | --- | --- | --- | --- | --- | --- | --- | --- |
| **Names** | **Effect** | **Estimate** | **SE** | **Lower** | **Upper** | **β** | **df** | **t** | ***p*** |
| (Intercept) | (Intercept) | 4.82056 | 1.2334 | 2.3972 | 7.24393 | 0.0000 | 487 | 3.9085 | < .001 |
| PBC[a](#a) Total Score | PBC Total Score | -0.28763 | 0.0544 | -0.3945 | -0.18079 | -0.2121 | 487 | -5.2898 | < .001 |
| ATT[a](#a) Total Score | ATT Total Score | 0.15109 | 0.0464 | 0.0600 | 0.24222 | 0.1304 | 487 | 3.2575 | 0.001 |
| SN[a](#a) Total Score | SN Total Score | 0.65248 | 0.0594 | 0.5358 | 0.76912 | 0.4129 | 487 | 10.9915 | < .001 |
| Knowledge Total Score | Knowledge Total Score | 0.21305 | 0.0449 | 0.1249 | 0.30124 | 0.1850 | 487 | 4.7467 | < .001 |
| Education1 | Secondary School, did not complete year 12 - Primary School | 0.77884 | 0.6962 | -0.5891 | 2.14676 | 0.3159 | 487 | 1.1187 | 0.264 |
| Education2 | Secondary School, completed year 12 - Primary School | 0.40342 | 0.6853 | -0.9431 | 1.74994 | 0.1636 | 487 | 0.5887 | 0.556 |
| Education3 | TAFE - Primary School | 0.72447 | 0.6646 | -0.5813 | 2.03025 | 0.2938 | 487 | 1.0901 | 0.276 |
| Education4 | Bachelor’s Degree - Primary School | 0.88008 | 0.6590 | -0.4147 | 2.17487 | 0.3570 | 487 | 1.3355 | 0.182 |
| Education5 | Postgraduate Degree, i.e. Masters, PhD - Primary School | 0.49893 | 0.6975 | -0.8715 | 1.86939 | 0.2024 | 487 | 0.7153 | 0.475 |
| Healthcare Worker Training1 | No - Yes | 0.11770 | 0.2763 | -0.4251 | 0.66049 | 0.0477 | 487 | 0.4261 | 0.670 |
| Healthcare Worker in Family1 | No - Yes | 0.08348 | 0.2008 | -0.3111 | 0.47807 | 0.0339 | 487 | 0.4157 | 0.678 |
| Relation to the child1 | Grandparent - Mother | 0.59229 | 0.6745 | -0.7330 | 1.91762 | 0.2402 | 487 | 0.8781 | 0.380 |
| Relation to the child2 | Father - Mother | -0.69515 | 0.5745 | -1.8239 | 0.43357 | -0.2819 | 487 | -1.2101 | 0.227 |
| Relation to the child3 | Other - Mother | -0.96644 | 0.4921 | -1.9334 | 4.88e-4 | -0.3920 | 487 | -1.9639 | 0.050 |
| Number of children below 12yrs | Number of children below 12yrs | -0.00231 | 0.1007 | -0.2001 | 0.19550 | -8.17e−4 | 487 | -0.0229 | 0.982 |
| Age | Age | -0.01699 | 0.0107 | -0.0380 | 0.00401 | -0.0686 | 487 | -1.5897 | 0.113 |
| Gender1 | Male - Female | 0.67146 | 0.5603 | -0.4295 | 1.77241 | 0.2723 | 487 | 1.1983 | 0.231 |
| Gender2 | Other/prefer not to say - Female | -0.03028 | 1.3678 | -2.7179 | 2.65729 | -0.0123 | 487 | -0.0221 | 0.982 |
| Gender3 | Non-binary: I identify as - Female | -0.69169 | 1.1332 | -2.9182 | 1.53480 | -0.2805 | 487 | -0.6104 | 0.542 |
| Social Desirability Score | Social Desirability Score | 0.16317 | 0.0622 | 0.0409 | 0.28546 | 0.0937 | 487 | 2.6215 | 0.009 |
| Area1 | Rural – Metro | 0.19523 | 0.1819 | -0.1622 | 0.55263 | 0.0792 | 487 | 1.0733 | 0.284 |

**a**PBC: Perceived behavioural control; ATT: Attitude; SN: Social norms
